# Supplementary material for: A scalable and eco-friendly carbohydrate-based oleogelator for vitamin E controlled delivery
Source: Royal Society of Chemistry journal article supplement (doi:10.1039/d4ra08087d), 2025-01-01
Supplement: d4ra08087d1.pdf [file d4ra08087d1.pdf]

## Supporting Information

# A Scalable and Eco-Friendly Carbohydrate-Based Oleogelator for Vitamin E Controlled Delivery

*Elizângela Hafemann Fragal,<sup>a,b</sup> Lorenzo Metilli,<sup>a,b</sup> Frédéric Pignon,<sup>b</sup> and Sami Halila<sup>a\*</sup>*

<sup>a</sup> Univ. Grenoble Alpes, CNRS, CERMAV 38000 Grenoble (France)

<sup>b</sup> Univ. Grenoble Alpes, CNRS, Grenoble INP (Institute of Engineering Univ. Grenoble Alpes), LRP, F-38000 Grenoble, France

### **Synthetic procedure for the preparation of sodium salts of $\beta$ -C-glycosybarbiturate derivatives**

The yields are indicated below the corresponding <sup>1</sup>H NMR spectra.

#### **Sodium 5-( $\beta$ -D-mannopyranosyl)-1,3-dimethyl barbiturate**

Mannose (5.5 mmol) and 1,3-dimethylbarbituric acid (5.5 mmol) were dissolved in 5 mL of distilled water, followed by the addition of NaHCO<sub>3</sub> (5.5 mmol) to neutralize around pH 7 under magnetic stirring at 80 °C. The reaction was monitored by TLC (7:2:1 ethyl acetate/methanol/H<sub>2</sub>O v/v/v). After 4 h, the carbohydrates had been consumed, and the reaction stopped. The purification was performed by precipitation by adding a methanol/ethyl acetate (20/80 v/v) mixture, and the white solid was removed by filtration and washed two times with the same mixture.

#### **Sodium 5-( $\beta$ -D-galactopyranosyl)-1,3-dimethyl barbiturate**

Galactose (5.5 mmol) and 1,3-dimethylbarbituric acid (5.5 mmol) were dissolved in 5 mL of distilled water, followed by the addition of NaHCO<sub>3</sub> (5.5 mmol) to neutralize around pH 7 under magnetic stirring at 80 °C. The reaction was monitored by TLC (7:2:1 ethyl acetate/methanol/H<sub>2</sub>O v/v/v). After 4 h, the carbohydrates had been consumed, and the reaction stopped. The purification was performed by precipitation by adding a methanol/ethyl acetate (20/80 v/v) mixture, and the white solid was removed by filtration and washed two times with the same mixture.

#### **Sodium 5-(β-D-maltosyl)-1,3-dimethyl barbiturate**

Maltose (2.7 mmol) and 1,3-dimethylbarbituric acid (2.7 mmol) were dissolved in 5 mL of distilled water, followed by the addition of NaHCO<sub>3</sub> (2.7 mmol) to neutralize around pH 7 under magnetic stirring at 80 °C. The reaction was monitored by TLC (7:2:1 ethyl acetate/methanol/H<sub>2</sub>O v/v). After 4 h, the carbohydrates had been consumed, and the reaction stopped. The purification was performed by precipitation by adding a methanol/ethyl acetate (20/80 v/v) mixture, and the white solid was removed by filtration and washed two times with the same mixture.

#### **Sodium 5-(β-D-glucopyranosyl)-1,3-dicyclohexyl barbiturate**

Glucose (0.5 mmol) and 1,3-dicyclohexylbarbituric acid (0.5 mmol) were dissolved in a 3 mL solution of (50/50) H<sub>2</sub>O/isopropyl alcohol, followed by the addition of NaHCO<sub>3</sub> (0.5 mmol) to neutralize around pH 7 under magnetic stirring at 80 °C. The reaction was monitored by TLC (7:2:1 ethyl acetate/methanol/H<sub>2</sub>O v/v/v). After 5 h, the carbohydrates had been consumed, and the reaction stopped. The purification was performed by flash column chromatography on silica gel by solid deposit with silica using as solvent 7:2:1 ethyl acetate/methanol/H<sub>2</sub>O v/v/v.

#### **Sodium 5-(β-D-cellobiosyl)-1,3-dicyclohexyl barbiturate**

Cellobiose (0.58 mmol) and 1,3-dicyclohexylbarbituric acid (1.1 mmol) (0.58 mmol) were dissolved in a 3 mL solution of (50/50) H<sub>2</sub>O/isopropyl alcohol, followed by the addition of NaHCO<sub>3</sub> (0.58 mmol) to neutralize around pH 7 under magnetic stirring at 80 °C. The reaction was monitored by TLC (7:2:1 ethyl acetate/methanol/H<sub>2</sub>O v/v/v). After 5 h, the carbohydrates had been consumed, and the reaction stopped. The purification was performed by flash column chromatography on silica gel by solid deposit with silica using as solvent 8:2 ethyl acetonitrile/H<sub>2</sub>O v/v.

### Production of GlcBMe oleogelator

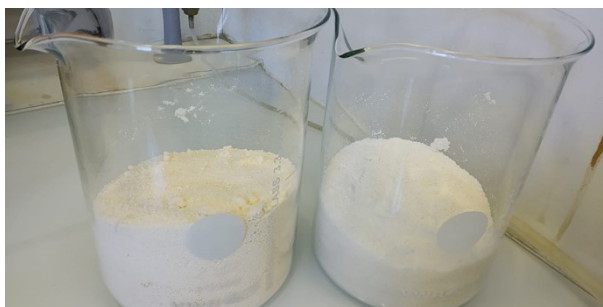

**Figure S1.** Picture of the synthesis of 1 Kg of  $\beta$ -C-glycosyl barbiturate (GlcBMe)

### <sup>1</sup>H NMR of sodium salts of $\beta$ -C-glycosyl barbiturates

#### Sodium 5-( $\beta$ -D-glucopyranosyl)-1,3-dimethyl barbiturate (GlcBMe)

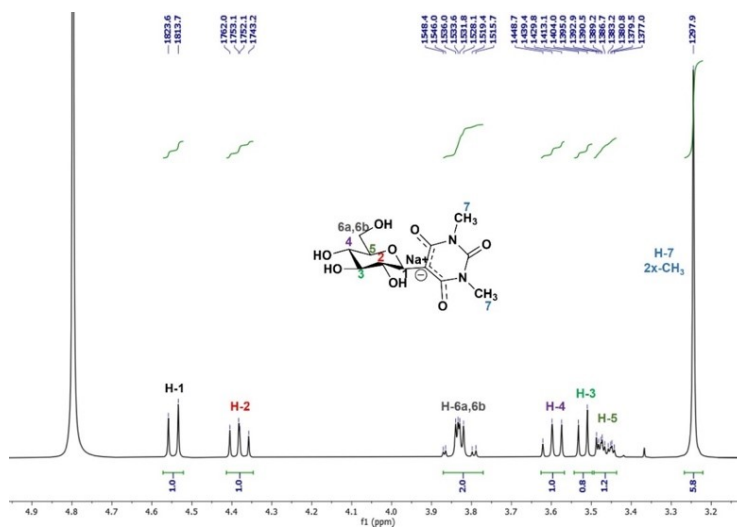

**Figure S2.** <sup>1</sup>H NMR spectrum (400 MHz, D<sub>2</sub>O, 298K)

**Yield:** 98 % (white solid)

$^1\text{H NMR}$  (400 MHz,  $\text{D}_2\text{O}$ )  $\delta$  4.54 (d, 1H,  $J=9.9$ , H-1), 4.37 (dd, 1H,  $J=9.9, 9.0$ , H-2), 3.86 – 3.76 (m, 2H, H-6a,6b), 3.62 – 3.56 (m, 1H, H-4), 3.51 (d,  $J=9.0$ , H-3), 3.49 – 3.43 (m, 1H, H-5), 3.24 (s, 6H, H-7)

HRMS(ESI): calcd for  $[\text{C}_{12}\text{H}_{17}\text{N}_2\text{NaO}_8 - \text{Na}]^-$ : 317.09904; found: 317.09795

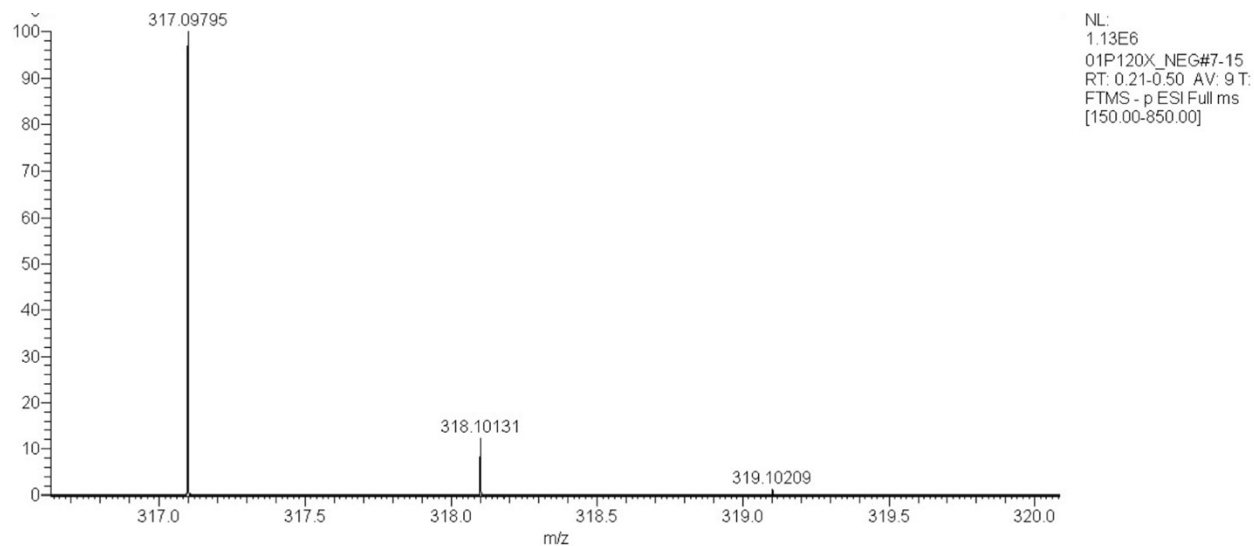

**Figure S3.** HRMS (ESI) of GlcBMe

### Sodium 5-( $\beta$ -D-mannopyranosyl)-1,3-dimethyl barbiturate (ManBMe)

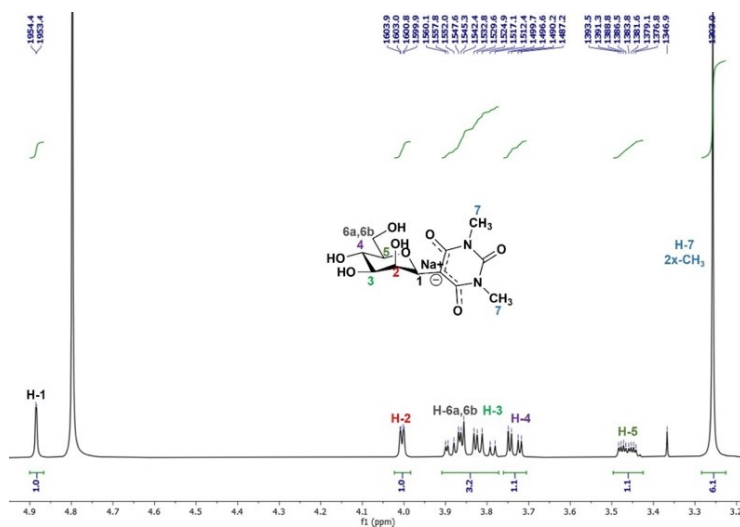

**Figure S4.**  $^1\text{H NMR}$  spectrum (400 MHz,  $\text{D}_2\text{O}$ , 298K)

**Yield:** 92 % (white solid)

$^1\text{H NMR}$  (400 MHz,  $\text{D}_2\text{O}$ )  $\delta$  4.88 (d, 1H,  $J = 1.0$ , H-1), 4.00 (dd, 1H,  $J = 3.1, 0.9$ , H-2), 3.91 – 3.84 (m, 2H, H-6a,6b), 3.84 – 3.77 (m, 1H, H-3), 3.73 (dd, 1H,  $J = 9.5, 3.1$ , H-4), 3.46 (ddd, 1H,  $J = 9.7, 4.8, 2.3$ , H-5), 3.26 (s, 6H, H-7).

HRMS (ESI)  $m/z$ : calcd for  $[\text{C}_{12}\text{H}_{17}\text{N}_2\text{NaO}_8 - \text{Na}]^-$ : 317.09904; found: 317.09821.

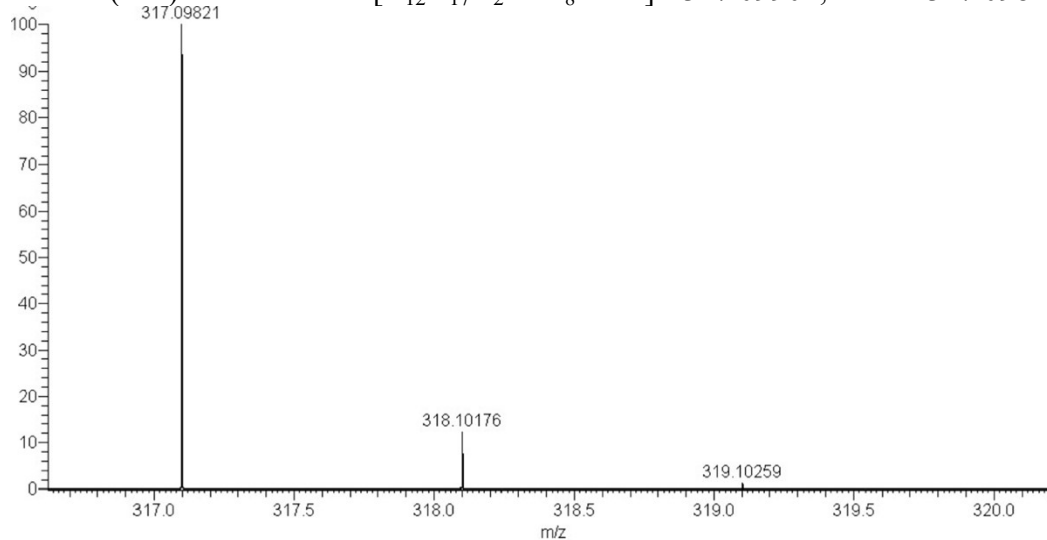

**Figure S5.** HRMS (ESI) of ManBMe

**Sodium 5-( $\beta$ -D-galactopyranosyl)-1,3-dimethyl barbiturate (GalBMe)**

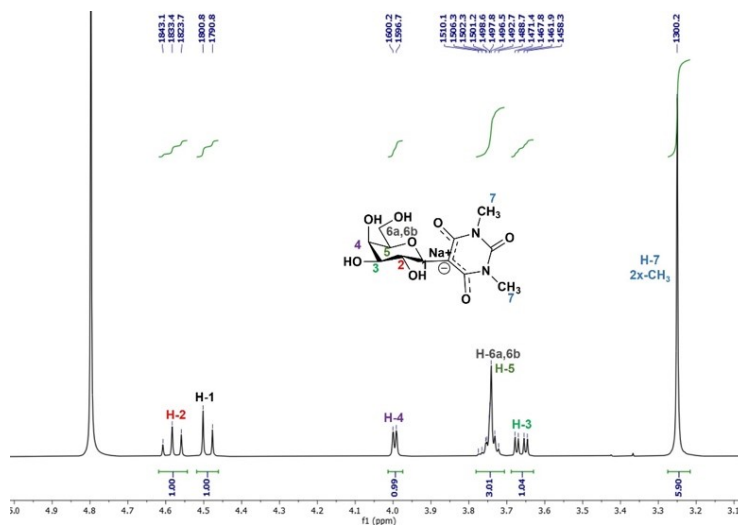

**Figure S6.**  $^1\text{H NMR}$  spectrum (400 MHz,  $\text{D}_2\text{O}$ , 298K)

**Yield:** 88 % (white solid)

$^1\text{H NMR}$  (400 MHz,  $\text{D}_2\text{O}$ )  $\delta$  4.58 (t, 1H,  $J = 9.7$ , H-2), 4.49 (d, 1H,  $J = 9.9$ , H-1), 4.00 (d, 1H,  $J = 3.4$ , H-4), 3.78 – 3.71 (m, 3H, H-5 and H-6a,6b), 3.66 (dd,  $J = 9.5, 3.5$ , H-3), 3.25 (s, 6H, H-7)

HRMS(ESI): calcd for  $[\text{C}_{12}\text{H}_{17}\text{N}_2\text{NaO}_8 - \text{Na}]^-$ : 317.09904; found: 317.09803

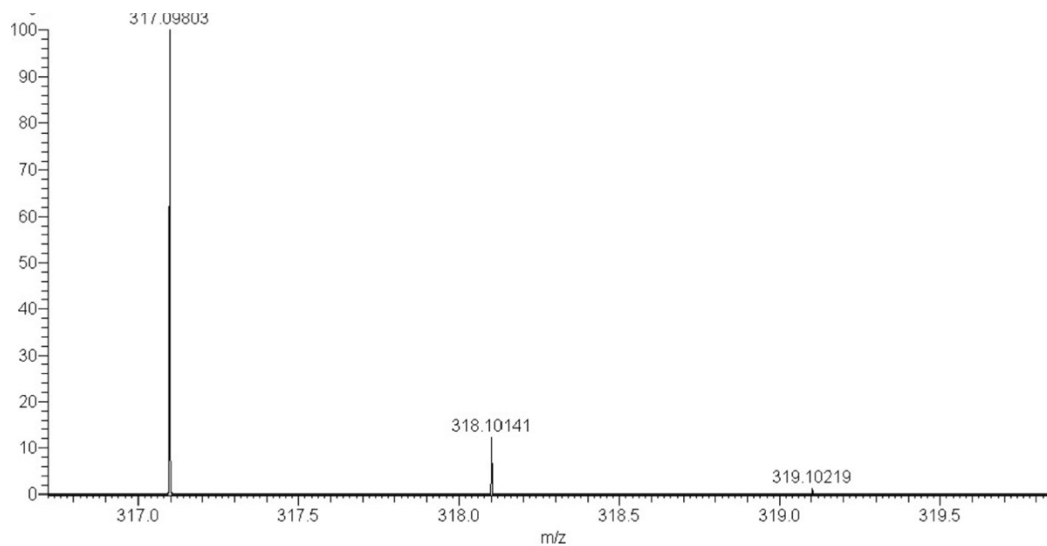

NL:  
1.12E6  
01P120W\_NEG#8-14  
RT: 0.25-0.47 AV: 7 T:  
FTMS - p ESI Full ms  
[150.00-850.00]

**Figure S7. HRMS (ESI) of GalBMe**

**Sodium 5-(β-D-maltosyl)-1,3-dimethyl barbiturate (MalBMe)**

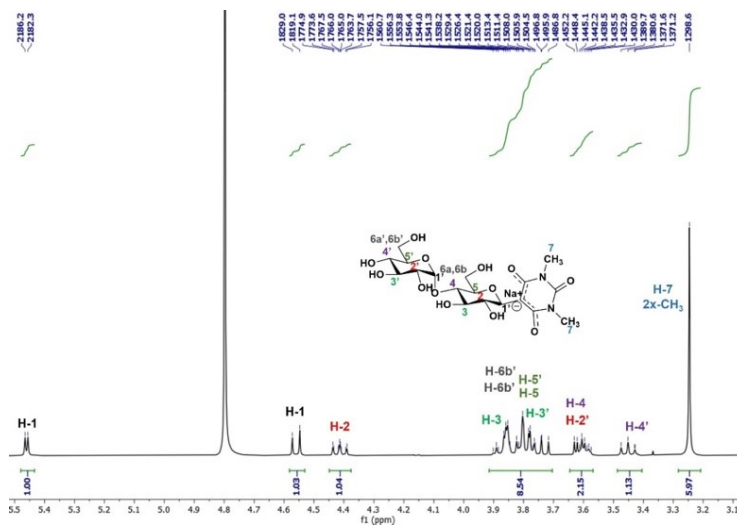

**Figure S8. <sup>1</sup>H NMR spectrum (400 MHz, D<sub>2</sub>O, 298K)**

**Yield:** 96 % (white solid)

<sup>1</sup>H NMR (400 MHz, D<sub>2</sub>O) δ 5.46 (d, 1H, *J* = 3.9, H-1'), 4.56 (d, 1H, *J* = 9.9, H-1), 4.45 – 4.38 (m, 1H, H-2), 3.92 – 3.70 (m, 8H, H-3, H-3', H-5, H-5', H-6a,6b, H-6'a,6'b), 3.65 – 3.57 (m, 2H, H-2', H-4), 3.45 (t, 1H, *J* = 9.1, H-4'), 3.25 (s, 6H, H-7).

HRMS(ESI): calcd for [C<sub>18</sub>H<sub>27</sub>N<sub>2</sub>NaO<sub>13</sub> – Na]<sup>-</sup>: 479.15186; found: 479.15161

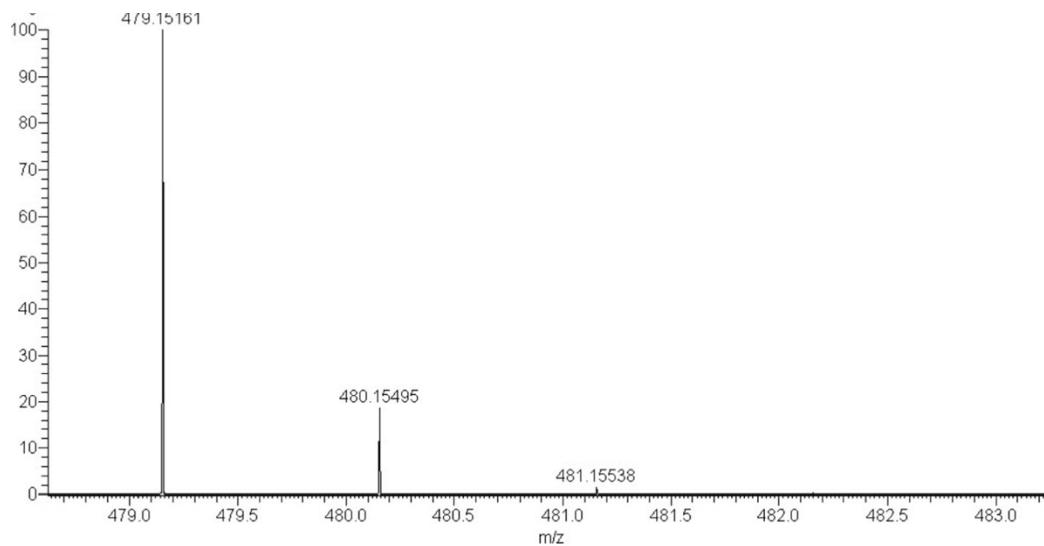

NL:  
2.64E5  
01P120V\_NEG#10-19  
RT: 0.34-0.66 AV: 10  
T: FTMS - p ESI Full ms  
[150.00-850.00]

**Figure S9. HRMS (ESI) of MalBMe**

**Sodium 5-( $\beta$ -D-glucopyranosyl)-1,3-dicyclohexyl barbiturate (GlcBCyclo)**

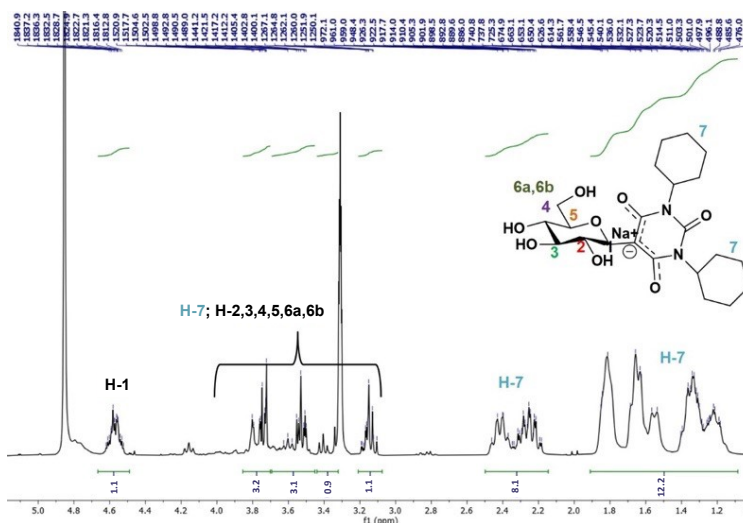

**Figure S10.  $^1\text{H}$  NMR spectrum (400 MHz,  $\text{MeOH-d}_4$ , 298K)**

**Yield:** 60 % (yellow solid)

$^1\text{H}$  NMR (400 MHz,  $\text{MeOH-d}_4$ )  $\delta$  4.57 (m, 1H, H-1), 3.85 – 3.06 (m, 8H, H-2, H-3, H-4, H-5, H-6a,6b, 2xH-7), 2.49 – 2.14 (m, 8H, H-7), 1.90 – 1.12 (m, 12H, H-7)

HRMS(ESI): calcd for  $[\text{C}_{22}\text{H}_{33}\text{N}_2\text{NaO}_8 - \text{Na}]^-$ : 453.22424; found: 453.22408

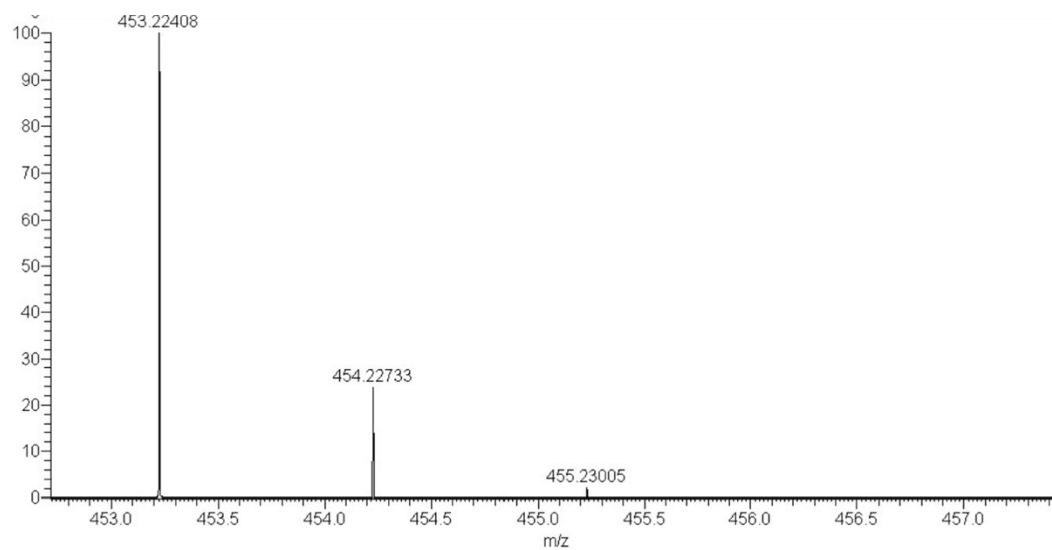

**Figure S11. HRMS (ESI) of GlcBCyclo**

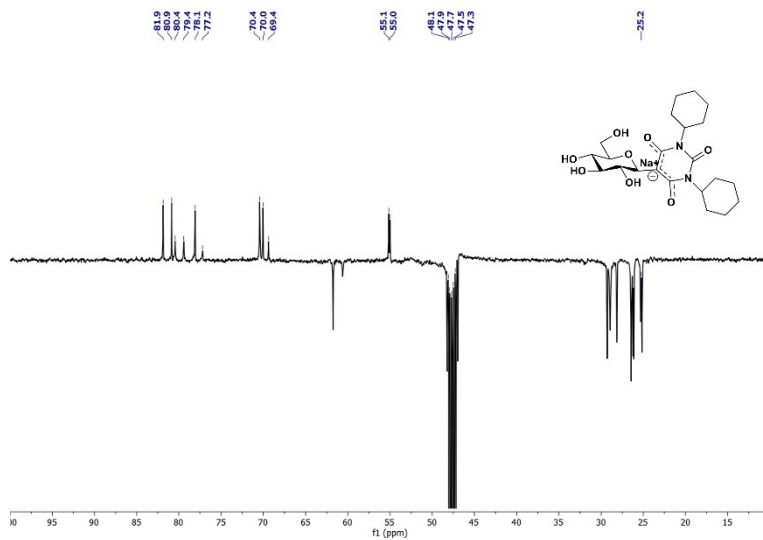

**Figure S12. DEPT-135  $^{13}\text{C}$  NMR spectrum (400 MHz, MeOD, 298K)**



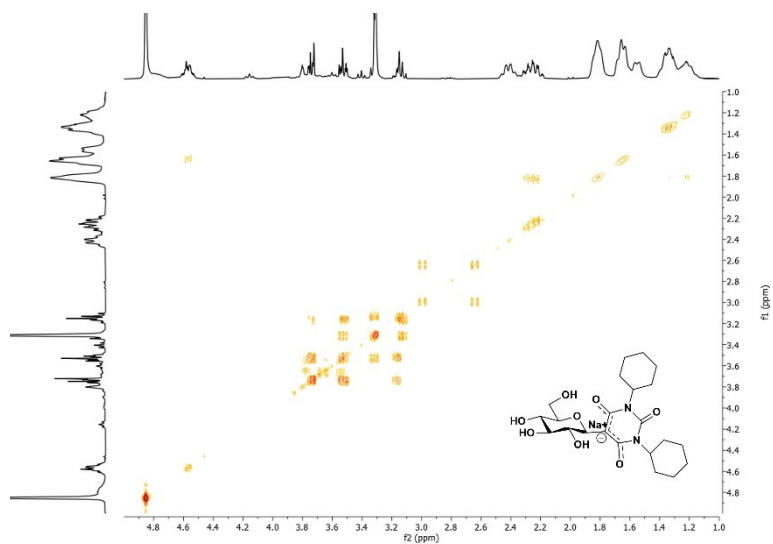

**Figure S13.** COSY spectrum (400 MHz, MeOD, 298K)

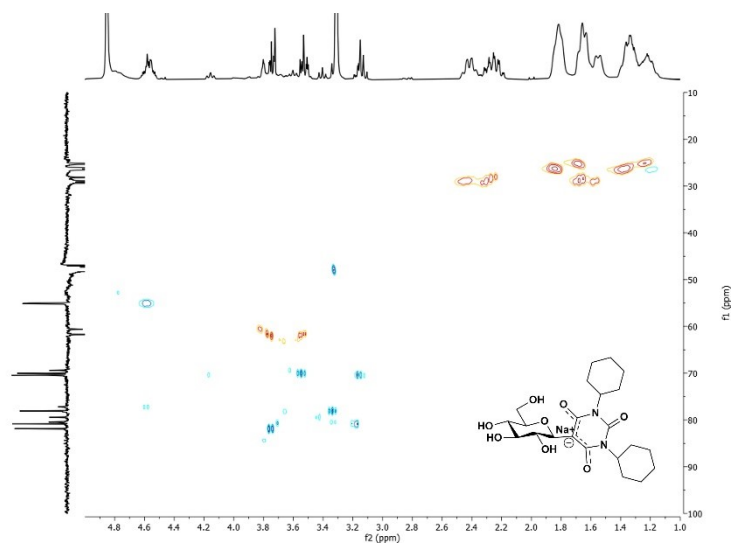

**Figure S14.** HSQC spectrum (400 MHz, MeOD, 298K)

**Sodium 5-(β-D-cellobiosyl)-1,3-dicyclohexyl barbiturate (CeIBCyclo)**

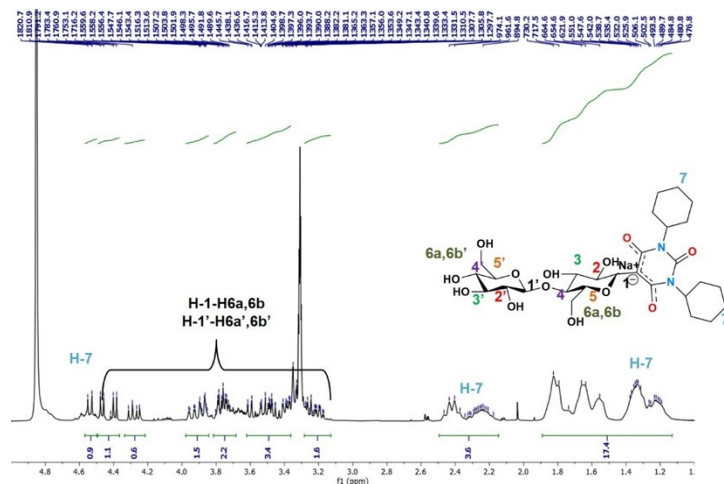

**Figure S15.**  $^1\text{H}$  NMR spectrum (400 MHz,  $\text{MeOH-d}_4$ , 298K)

**Yield:** 20 % (pink solid)

$^1\text{H}$  NMR (400 MHz,  $\text{MeOH-d}_4$ )  $\delta$  4.54 (d,  $J = 9.8$ , 1H, H-1), 4.43 (d,  $J = 7.8$ , H-1'), 4.39 (d,  $J = 7.8$ , H-4), 4.34 – 4.22 (m, 1H, H-2), 3.98 – 3.13 (m, 12H, H-2', H-3, H-3', H4', H-5, H5', H-6a,6b, H-6'a,6'b, 2xH-7), 2.49 – 2.15 (m, 4H, H-7), 1.89 – 1.13 (m, 16H, H-7).

HRMS(ESI): calcd for  $[\text{C}_{28}\text{H}_{43}\text{N}_2\text{NaO}_{13} - \text{Na}]^-$ : 615.27706; found: 615.27594

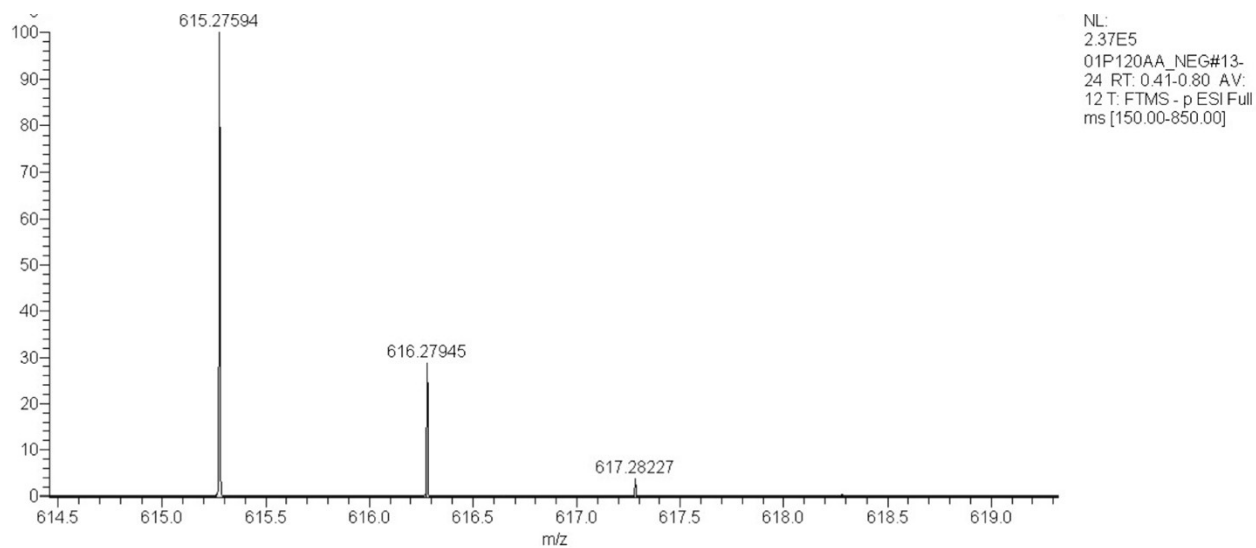

**Figure S16.** HRMS (ESI) of CelBCyclo

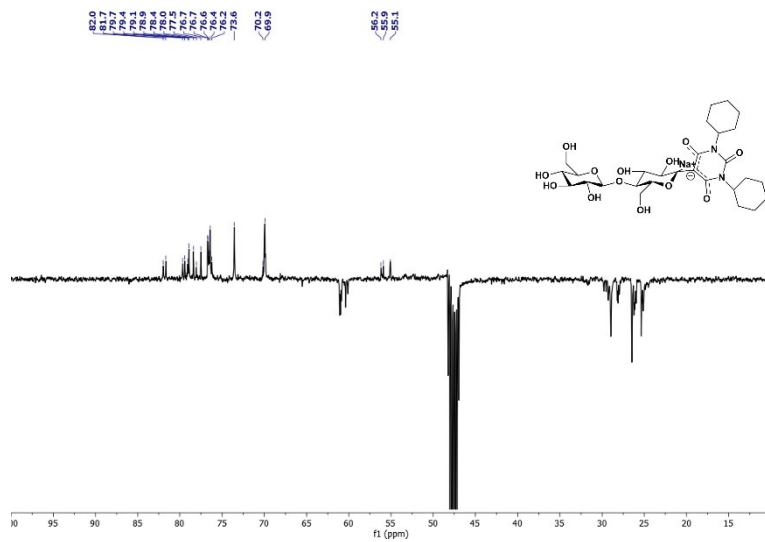

**Figure S17.** DEPT-135  $^{13}\text{C}$  NMR spectrum (400 MHz, MeOD, 298K)

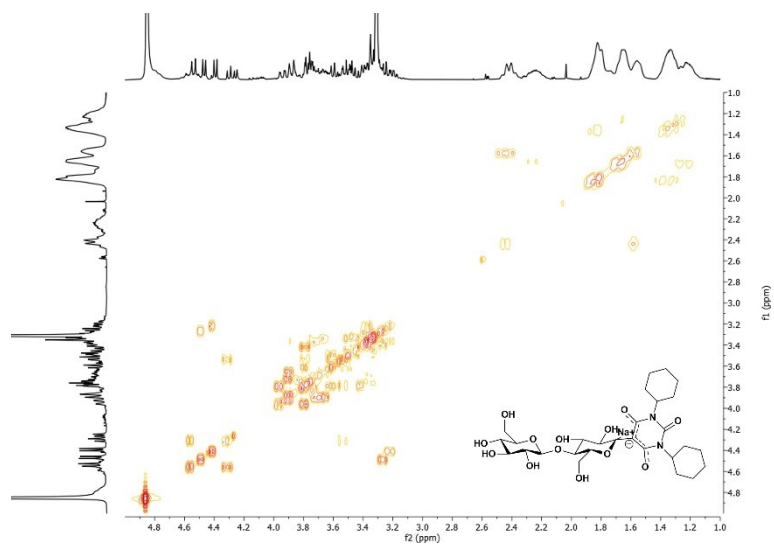

**Figure S18.** COSY spectrum (400 MHz, MeOD, 298K)

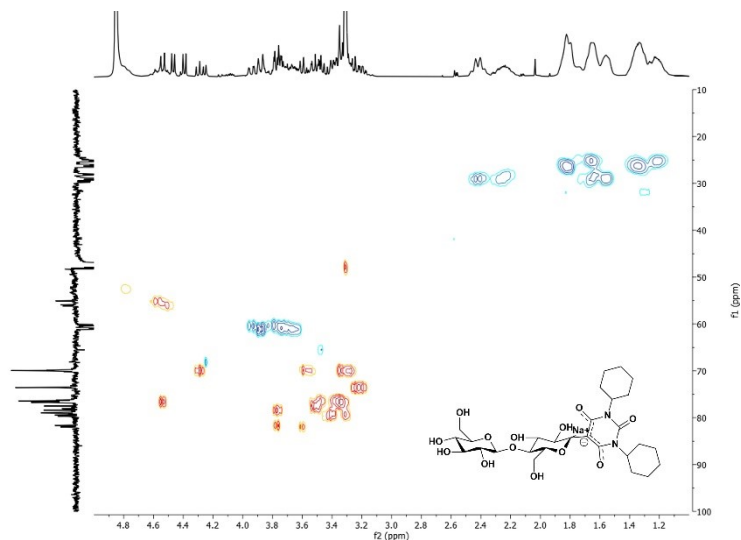

Figure S19. HSQC spectrum (400 MHz, MeOD, 298K)

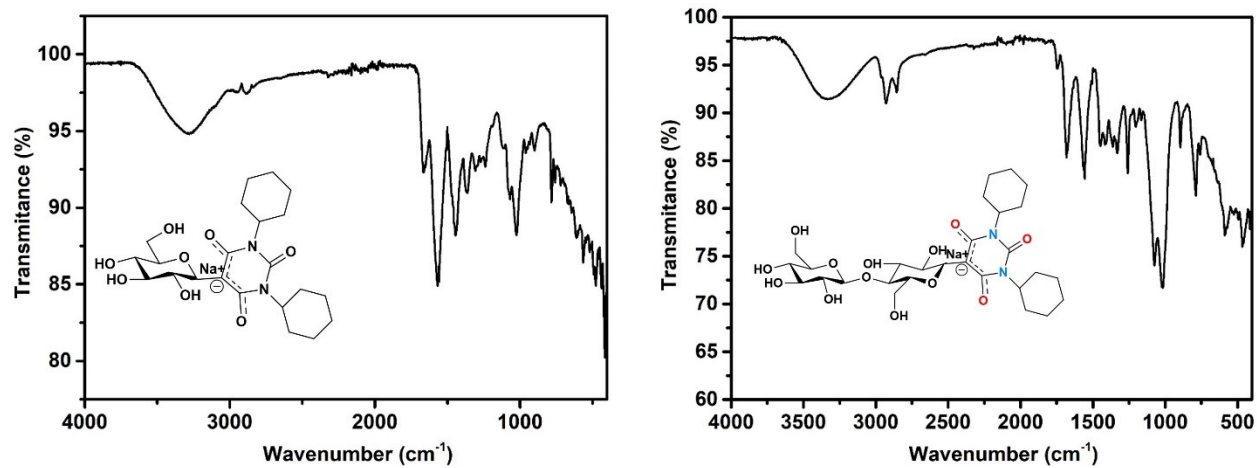

Figure S20. FTIR spectra of sodium 5-( $\beta$ -D-glucopyranosyl)-1,3-dicyclohexyl barbiturate (GlcBCyclo) and Sodium 5-( $\beta$ -D-cellobiosyl)-1,3-dicyclohexyl barbiturate (CelBCyclo)

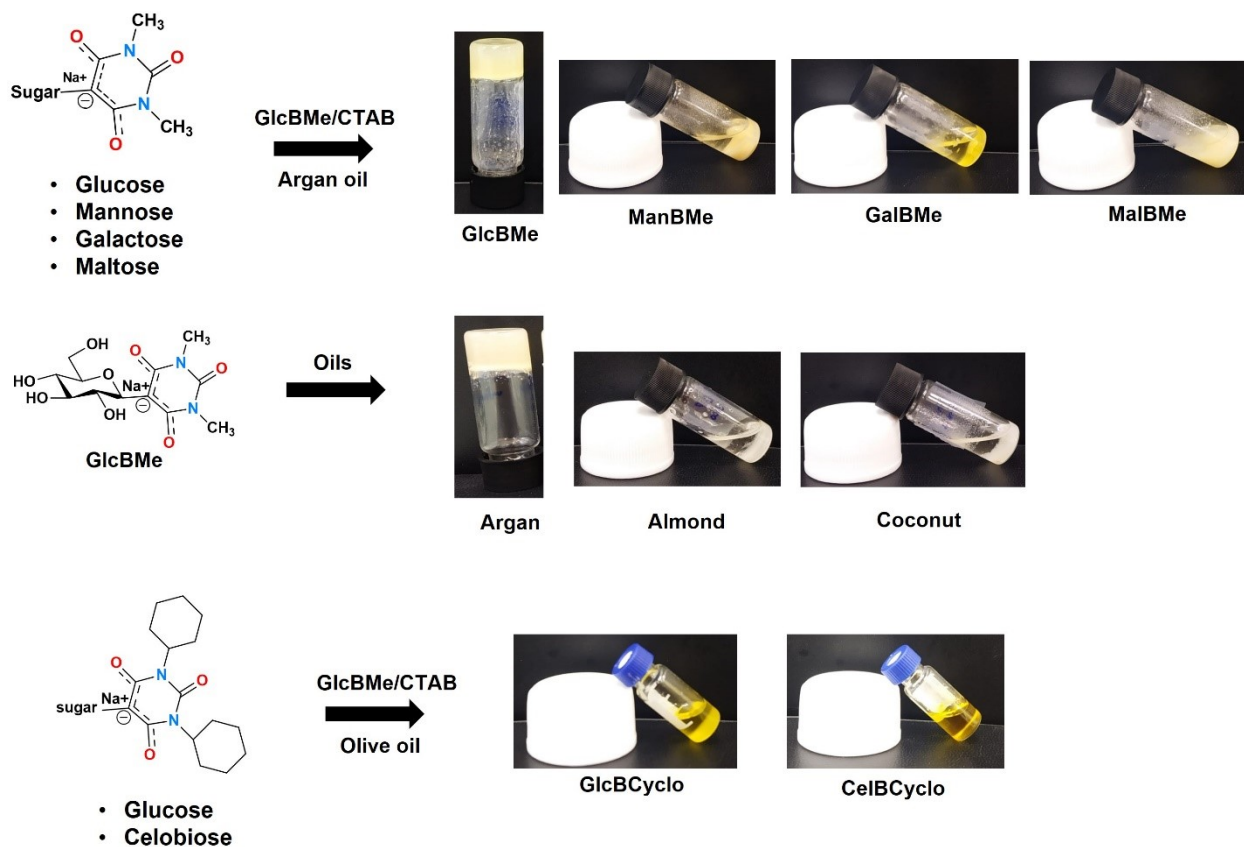

**Figure S21.** Oleogels prepared based on sodium salt of  $\beta$ -C-glycosyl barbiturates

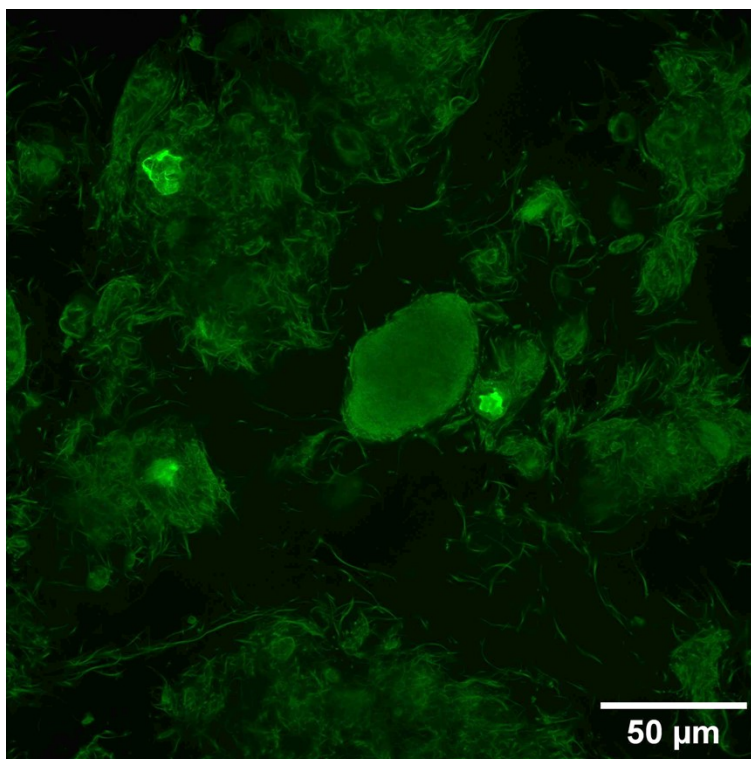

Figure S22. Confocal image for **GlcBMe-C-Ar**

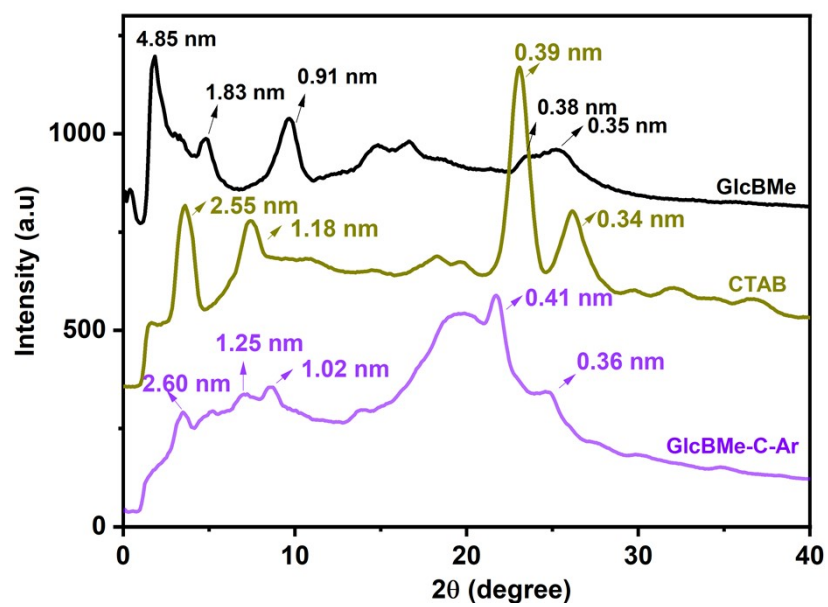

Figure S23. XRD patterns of the **GlcBMe**, **CTAB** and **GlcBMe-C-Ar** oleogel.

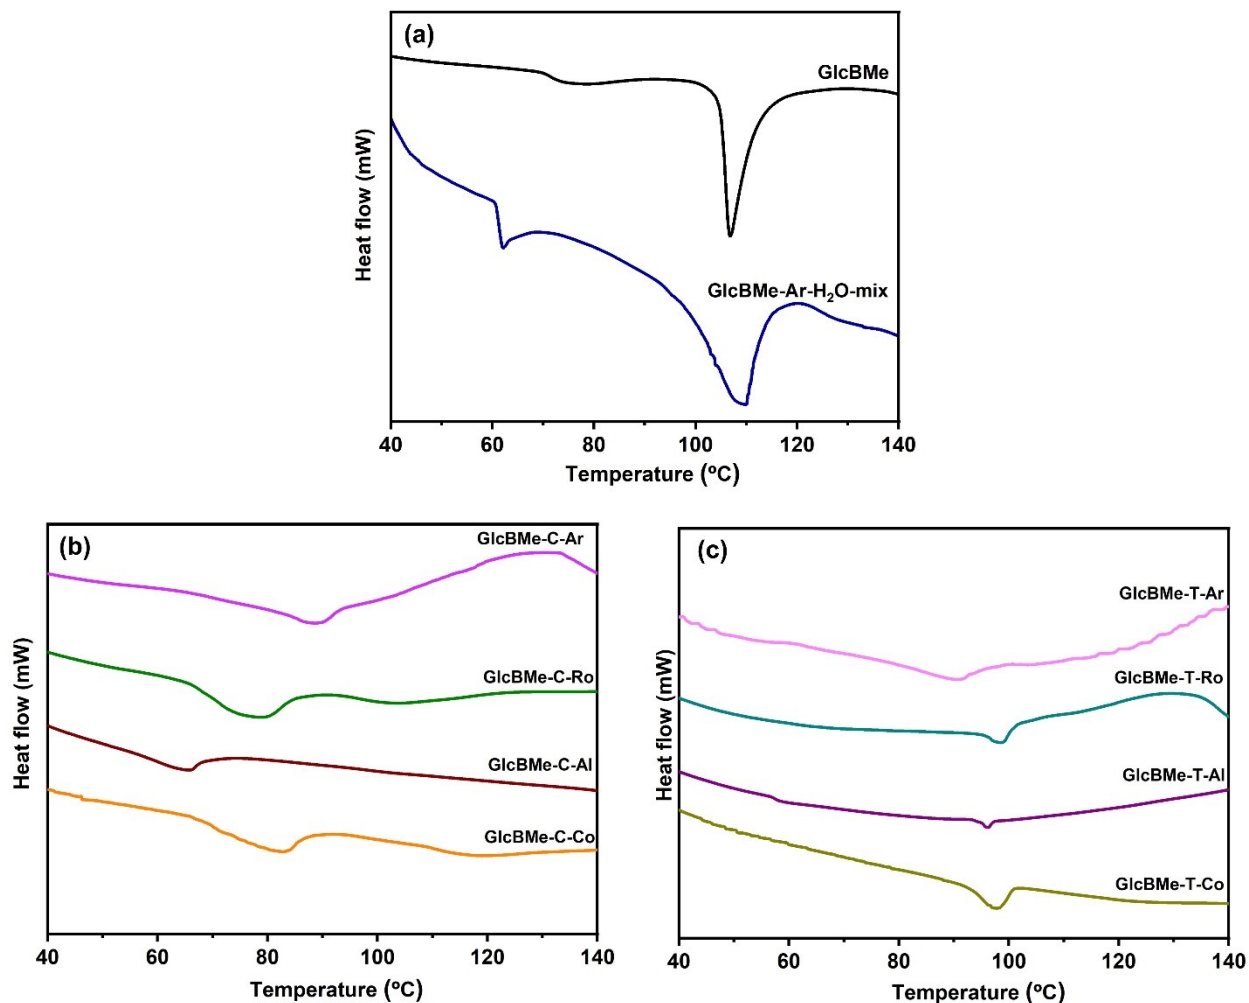

**Figure S24.** DSC graph of (a) **GlcBMe** and **GlcBMe-Ar-H<sub>2</sub>O-mix** (b) **GlcBMe-C-Ar**, **GlcBMe-C-Ro**, **GlcBMe-C-Al**, **GlcBMe-C-Co** (b) **GlcBMe-T-Ar**, **GlcBMe-T-Ro**, **GlcBMe-T-Al**, **GlcBMe-T-Co**

**Table S1.** Melting temperature and enthalpy of all the samples

| Oleogels samples   | T <sub>on</sub> | T <sub>peak</sub> (°C) | ΔH (J g <sup>-1</sup> ) |
|--------------------|-----------------|------------------------|-------------------------|
| <b>GlcBMe-C-Ar</b> | 72.6            | 88.6                   | 4.5                     |
| <b>GlcBMe-C-Ro</b> | 62.8            | 74.8                   | 3.7                     |
| <b>GlcBMe-C-Al</b> | 59.6            | 78.3                   | 2.3                     |
| <b>GlcBMe-C-Co</b> | 64.9            | 78.3                   | 2.4                     |
| <b>GlcBMe-T-Ar</b> | 66.6            | 89.6                   | 3.31                    |
| <b>GlcBMe-T-Ro</b> | 95.6            | 99.1                   | 0.27                    |
| <b>GlcBMe-T-Al</b> | 94.7            | 96.1                   | 0.08                    |
| <b>GlcBMe-T-Co</b> | 92.2            | 96.9                   | 0.53                    |

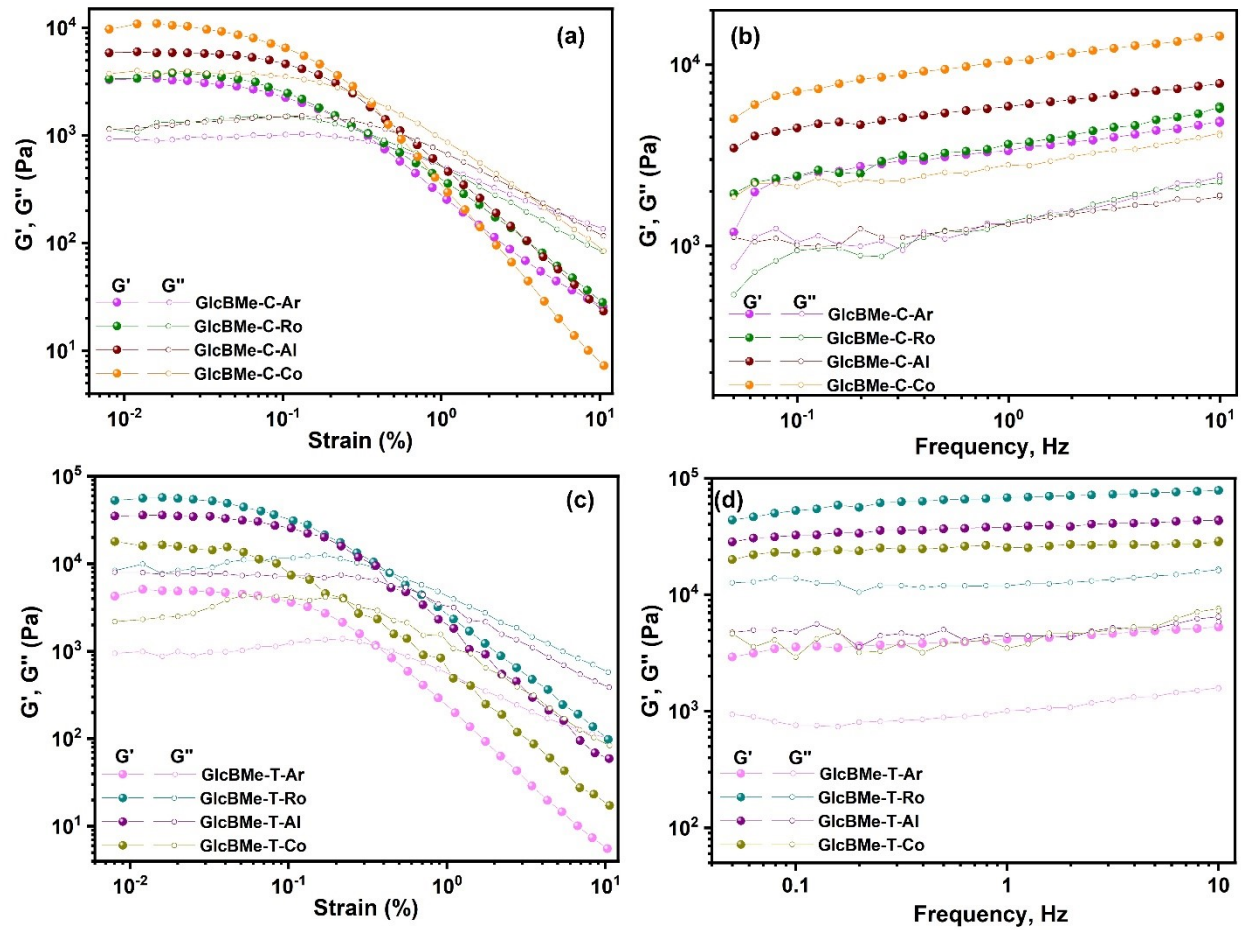

**Figure S25.** (a) Strain sweeps (b) Frequency sweep for oleogels based different oils in CTAB (c) Strain sweeps (d) Frequency sweep for oleogels based different oils in TBAB



**Table S2.** Comparison of rheology data

| Oleogels samples (2wt%)              | Maximum $G'$ value (Pa) | $\delta = G''/G'$ |
|--------------------------------------|-------------------------|-------------------|
| GlcBMe-C-Ro                          | 3091                    | 0.37              |
| GlcBMe-C-Al                          | 4477                    | 0.22              |
| GlcBMe-C-Co                          | 7128                    | 0.27              |
| GlcBMe-T-Ro                          | 68050                   | 0.18              |
| GlcBMe-T-Al                          | 37880                   | 0.12              |
| GlcBMe-T-Co                          | 25250                   | 0.14              |
| 12-hydroxystearic acid <sup>1</sup>  | 1784                    | > 0.5             |
| Sorbitan monostearate* <sup>2</sup>  | 10-100                  |                   |
| Mannitol dioctanoates** <sup>3</sup> | 4300                    | //                |
| Sorbitol dioctanoates** <sup>3</sup> | 2052                    | //                |
| Monoglyceride <sup>4</sup>           | 3427                    | 0.17              |
| CARBOPOL974 <sup>5</sup>             | 35                      | 1.95              |
| Ethylcellulose <sup>6</sup>          | 1468                    | 0.10              |

\*10wt.%, \*\* 5wt.%

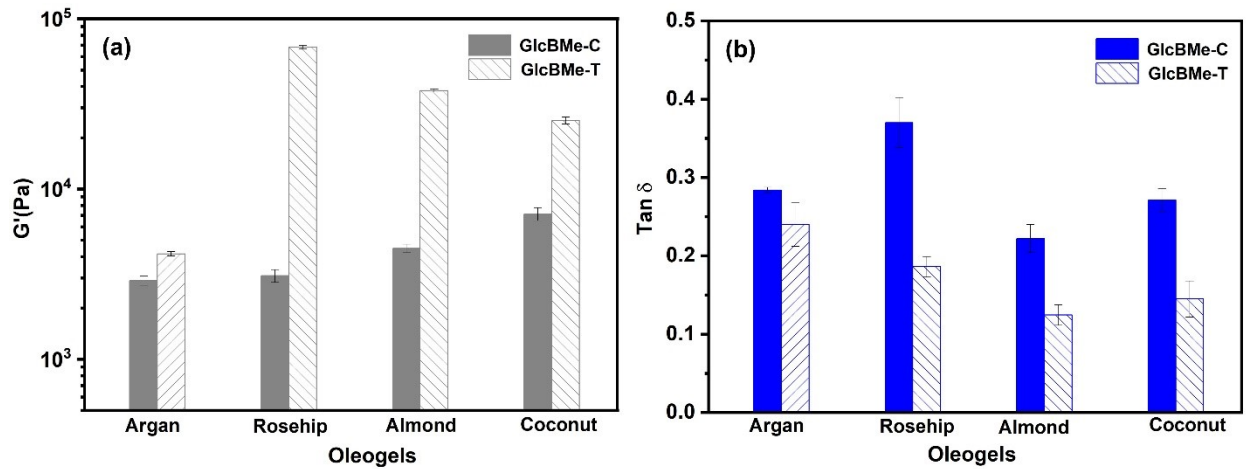

**Figure S26.** (a)  $G'$  vs. oleogels samples in CTAB and TBAB (b)  $\tan \delta$  vs. oleogels samples in CTAB and TBAB

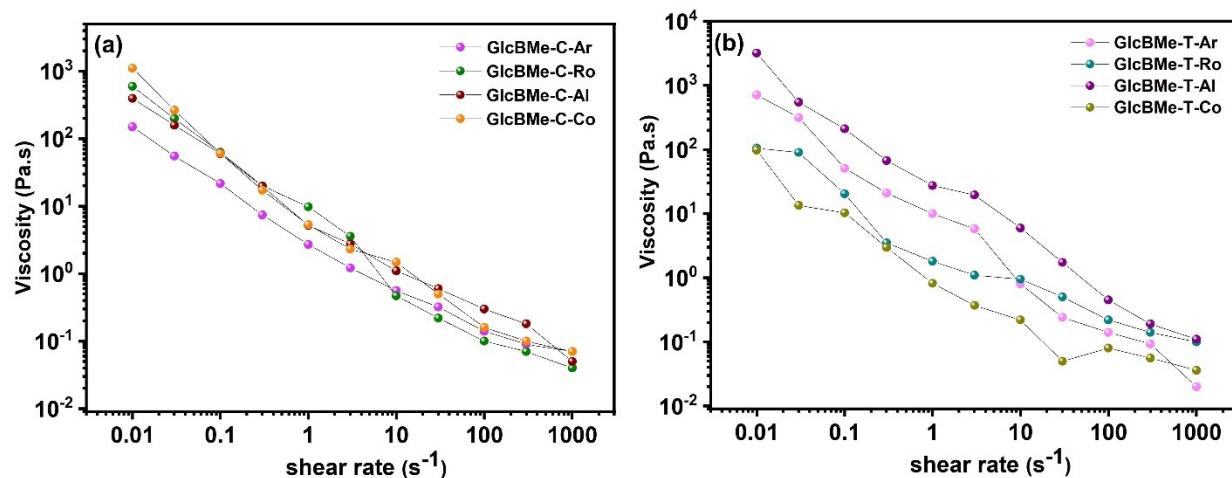

**Figure S27.** (a) Viscosity versus shear rate for samples based CTAB (b) Viscosity versus shear rate for samples based TBAB

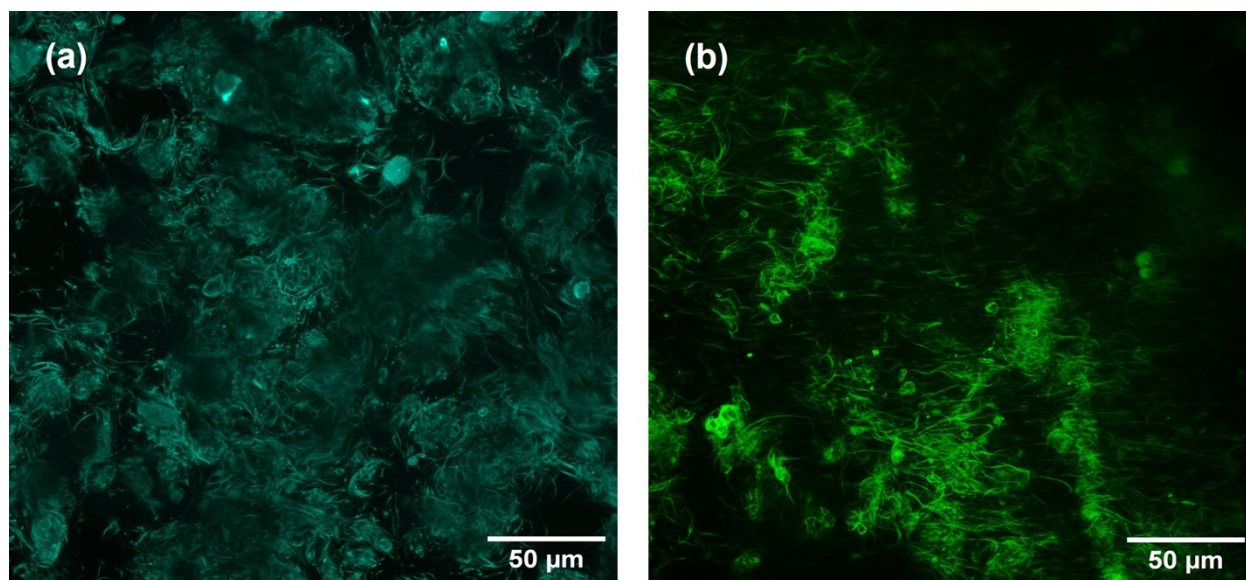

**Figure S28.** (a) Confocal image before shear (b) Confocal image after shear for **GlcBMe-C-Ar** oleogel

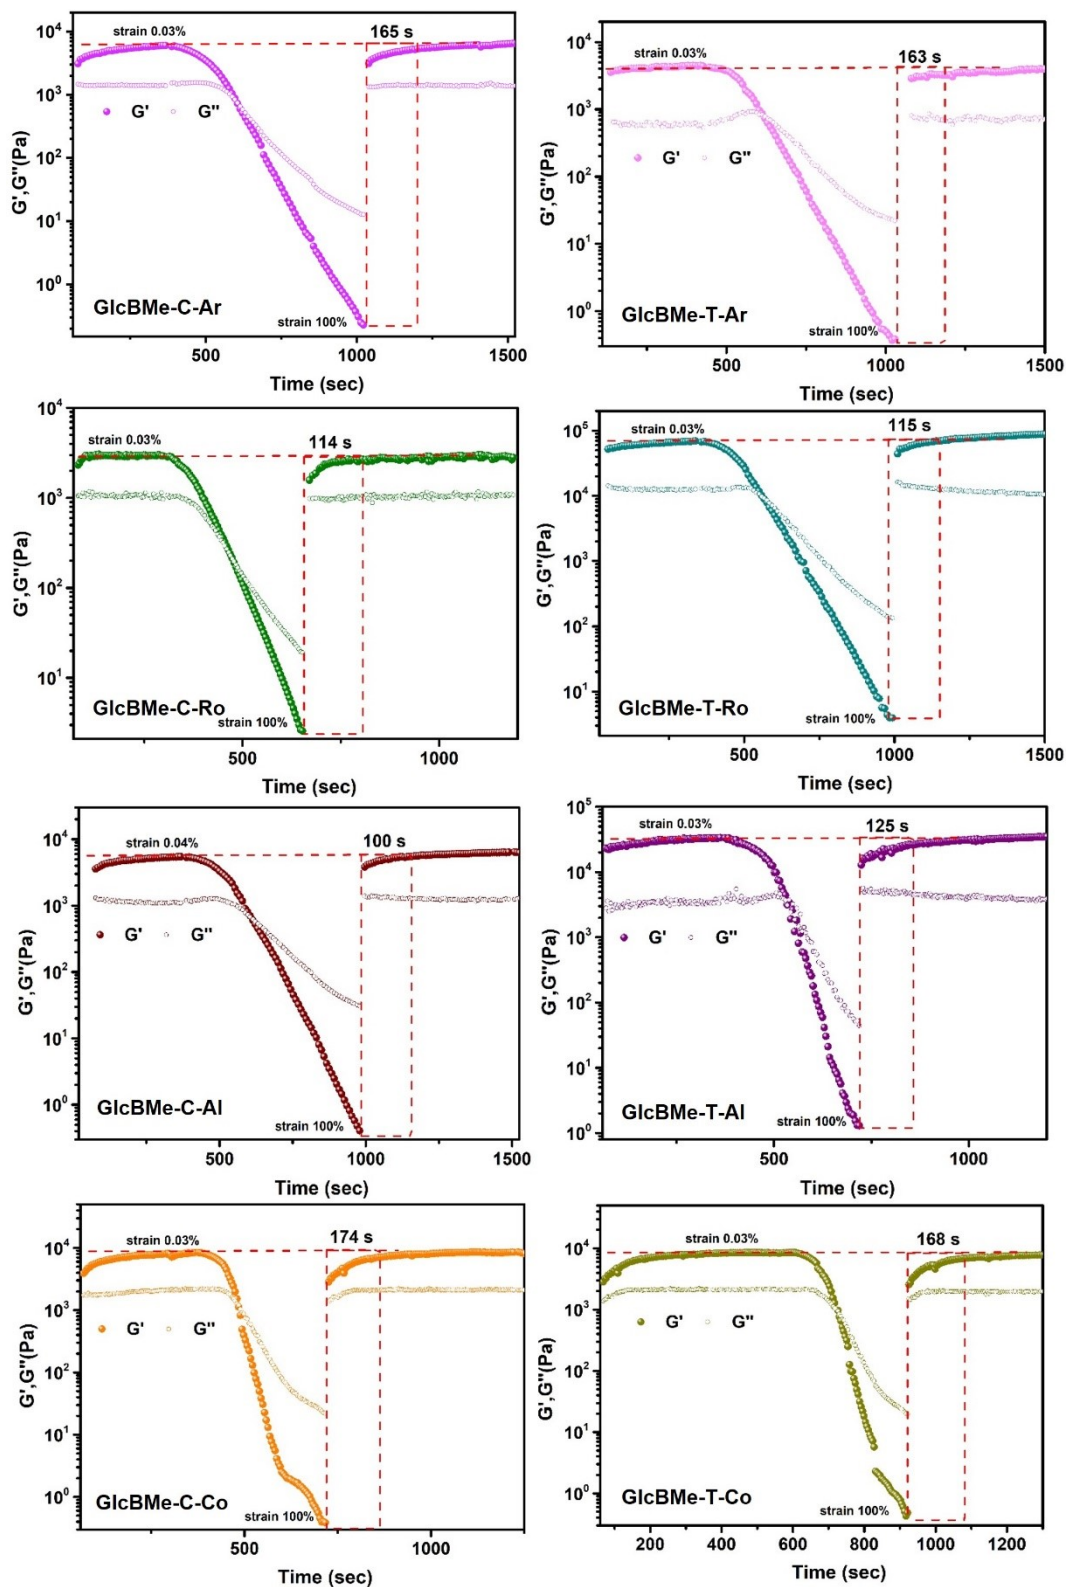

**Figure S29.** Thixotropic behavior of oleogels based, rosehip, almond, and coconut with CTAB or TBAB

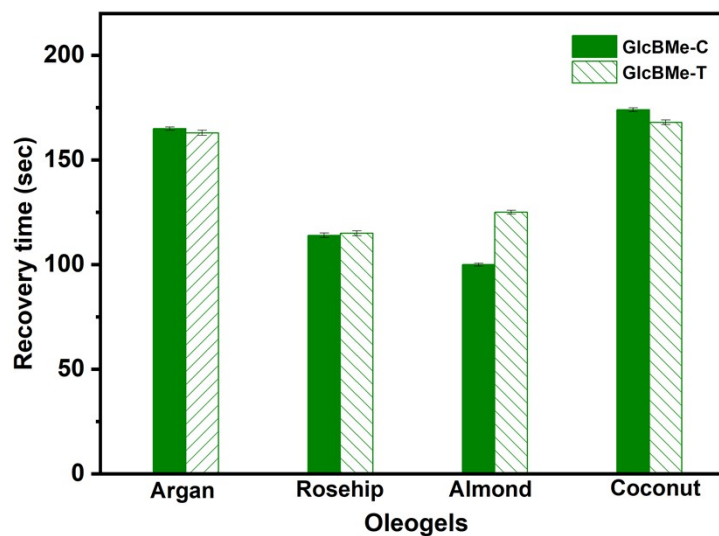

**Figure S30.** Recovery time (sec) for all samples in CTAB and TBAB

**Table S3.** Main fatty acid composition (%) of argan, rosehip, almond, and coconut oil

| <b>Fatty acid (%)</b>              | <b>Argan<sup>7</sup></b> | <b>Rosehip<sup>8</sup></b> | <b>Almond<sup>9</sup></b> | <b>Coconut<sup>10</sup></b> |
|------------------------------------|--------------------------|----------------------------|---------------------------|-----------------------------|
| <b>Palmitic acid</b><br>(C16:0)    | 15.5                     | 3.6                        | 5.5                       | 16.5                        |
| <b>Linoleic acid</b><br>(C18:2)    | 35                       | 52.5                       | 28                        | 1.6                         |
| <b>Stearic acid</b><br>(C18:0)     | 8.5                      | 2.3                        | 1.2                       | 3.1                         |
| <b>Oleic acid</b><br>(C18:1)       | 41.2                     | 19.8                       | 62                        | 9.1                         |
| <b>Linolenic acid</b><br>(C18:3)   | //                       | 20.5                       | //                        | 1.6                         |
| <b>Palmitoleic acid</b><br>(C16:1) | //                       | //                         | //                        | //                          |
| <b>Lauric acid</b><br>(C12:0)      | //                       | //                         | //                        | 41.2                        |
| <b>Miristic acid</b><br>(C14:0)    | //                       | //                         | //                        | 23.9                        |
| <b>Capric acid</b><br>(C10:0)      | //                       | //                         | //                        | 3.9                         |

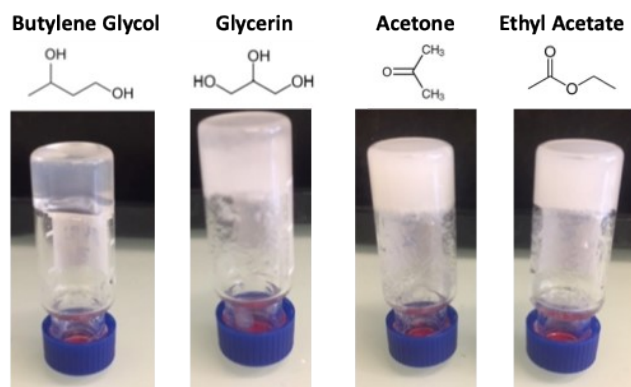

**Figure S31.** Digital pictures of inverted tubes including gelled butylene glycol, glycerin, acetone, and ethyl acetate

## REFERENCES

- [1] C.L. Esposito, V. Tardif, M. Sarrazin, P. Kirilov, V.G. Roullin, *Mater. Sci. Eng. C, Mater. Biol. Appl.* **2020**, *114*, 110999.
- [2] M.T.H. Swe, P. Asavapichayont, *Asian J. Pharm. Sci.* **2018**, *13* (5), 485–497.
- [3] M. Samateh, S.S. Sagiri, R. Sanni, C.A. Chee, S. Satapathy, G. John, *J. Agric. Food Chem.* **2020**, *68* (46), 13282–13290.
- [4] S. Pieve, S. Calligaris, E. Co, M. Nicoli, A. Marangoni, A. *Food Biophys.* **2010**, *5*, 211–217.
- [5] G. Bonacucina, S. Martelli, G.F. Palmieri, *Int. J. Pharm.* **2004**, *282* (1-2), 115–130.
- [6] R. Zhang, Y. Zhang, J. Yu, Y. Gao, L. Mao, *Foods* **2022**, *11* (15), 2364.
- [7] S. Gharby, Z. Charrouf, *Front. Nutr. Sci.* **2021**, *8*, 804587.
- [8] I. Mármol, C. Sánchez-de-Diego, N. Jiménez-Moreno, C. Ancín-Azpilicueta, M.J. Rodríguez-Yoldi, *Int. J. Mol. Sci.* **2017**, *18* (6), 1137.
- [9] Z. Shi, Q. Fu, B. Chen, S. Xu, S. *Chin. J. Chromatogr.* **1999**, *17* (5), 506–507.
- [10] A. Suryanto, S. Suprpto, M. Mahfud, *Bull. Chem. React. Eng.* **2015**, *10*(2), 162–168.
